# Supplementary material for: HOCOMOCO: a comprehensive collection of human transcription factor binding sites models
Source: Oxford University Press journal article supplement (doi:10.1093/nar/gks1089), 2012-11-21
Supplement: 1056610_Supplementary_Data.zip [file 1056610_Supplementary_Data.zip]

Archive with 3 entries (3 files):
- nar-02101-data-e-2012-File006.xls
- nar-02101-data-e-2012-File004.pdf
- nar-02101-data-e-2012-File005.doc
