# Supplementary material for: HOCOMOCO: a comprehensive collection of human transcription factor binding sites models
Source: Oxford University Press journal article supplement (doi:10.1093/nar/gks1089), 2012-11-21
Supplement: 1056610_Supplementary_Data.zip [file 1056610_Supplementary_Data.zip › nar-02101-data-e-2012-File006.xls]

## Sheet: Supplementary table 1
TF	quality	annotation comment	macthes Uniprot consensus (yes/no/almost/one out of many/all/unclear)	model	rule	information from external sources (Uniprot)
AHR	B			si	W, S	Efficient DNA binding requires dimerization with another bHLH protein. In the nucleus, heterodimer of AHR and ARNT; Binds to the XRE promoter region.		Overall Statistics	quality			model
AIRE	C	secondary box not found	one out of many	f2	S	Binds DNA as a dimer or as a tetramer, but not as a monomer; preferred motif is a tandem repeat of 5'-ATTGGTTA-3' combined with a 5'-TTATTA-3' box.			A	49		f1	307
ALX1	B			si	W, S	Acts at a palindromic recognition sequence; homeobox.			B	82		si	114
ANDR	B			do	W, S	Binds DNA as homodimer.			C	128		f2	35
AP2A	A		yes	f2	S, L	Binds DNA as a dimer. Can form homodimers or heterodimers with other AP-2 family members; 5'-GCCNNNGGC-3'.			D	142		do	26
AP2B	B		yes	f1	W, L, S	Binds DNA as a dimer. Can form homodimers or heterodimers with other AP-2 family members; 5'-GCCNNNGGC-3'.			E	55
AP2C	A		yes	f1	W, L, S	Binds DNA as a dimer. Can form homodimers or heterodimers with other AP-2 family members; 5'-GCCNNNGGC-3'.			F	18
AP2D	D		yes	f1	L, S	Binds DNA as a dimer. Can form homodimers or heterodimers with other AP-2 family members; 5'-GCCNNNGGC-3'.
APEX1	E	quality "D", not marked as a TF		f1	S	Binds DNA as a monomer and as a homodimer.			good,A-D	401		no prior	342
ARI3A	D			f1, do	W, S	Binds DNA as a homodimer and as a heterodimer.			bad,E-F	73		shape prior	140
ARI5B	C		yes	f1	W, S	Binds to the 5'-AATA[CT]-3'.						total models	482
ARNT	B			f1	W, S	Efficient DNA binding requires dimerization with another bHLH protein. Forms a heterodimer with AHR, AHRR, HIF1A.
ARNT2	D			si	W, L	Efficient DNA binding requires dimerization with another bHLH protein.			rules	usage
ATF1	B		yes	si	S, W, L	Binds the cAMP response element (CRE) (consensus: 5'-GTGACGT[AC][AG]-3'); Binds DNA as a dimer.			S	317
ATF2+ATF4	B		yes	f1	S, W, L	Binds the cAMP response element (CRE) (consensus: 5'-GTGACGT[AC][AG]-3'); Binds DNA as a dimer.			W	152
ATF3	A		yes	f1	S, W, L	Binds the cAMP response element (CRE) (consensus: 5'-GTGACGT[AC][AG]-3'); Binds DNA as a dimer.			L	195
ATF5	C	not similar to ATF1-3	no	si	W, S	Binds the cAMP response element (CRE) (consensus: 5'-GTGACGT[AC][AG]-3'); Binds DNA as a dimer.			P	81
ATF6A	B		yes	si	W, S	Binds the cAMP response element (CRE) (consensus: 5'-GTGACGT[AC][AG]-3'); Binds DNA as a dimer.
BACH1	C	similar to NFE2		si	S	Binds, in-vitro, to NF-E2 (NFE2) binding sites.		quality	A	extra-high confidence motif (large dataset, reasonable motif shape, similarity to known sources / other motifs)
BARX2	D	full motif not recovered	almost	si	W	Binds optimally to the DNA consensus sequence 5'-YYTAATGRTTTTY-3'.			B	high confidence motif
BATF	B	secondary motif not found	one out of many	si	W, S	Bind DNA preferentially at (TRE) (consensus: 5'-TGA[CG]TCA-3') and weaker at the cAMP-responsive region (CRE) (consensus: 5'-GTGACGT[AC][AG]-3'); forms heterodimers.			C	good confidence motif
BC11A	F	chipseq w/o base coverage							D	mediocre confidence motif (missing part of the known consensus / bad motif shape)
BCL3	F	mask TGTG, requires additional analysis							E	low quality motif found / protein is not marked as a TF
BCL6	C			f1	S				F	motif not found
BDP1	E			f1	P
BHE40	A			f2	S, W, L	Able to homodimerize or heterodimerize.		rule	S	stable motif, the same motif obtained for not less then 2 ChIPMunk modes
BHE41	D			f1	S, L	Able to homodimerize.			W	best weight / number of sequences
BMAL1	C		yes	f1	S	Binds DNA as heterodimers with CLOCK activate E-box element (3'-CACGTG-5').			L	like other motifs for the same family
BPTF	D			si	P				P	profile (reasonable shape of the motif)
BRAC	D		almost	si	W, S	Binds to a palindromic site (called T site); t-box 5'-TCACACCT-3'.
BRCA1	D			f1	S	Binds DNA as a heterodimer with BARD1.
BRF2	F
CBP	E			f1	S
CDA7L	E			f1	S
CDC5L	D			si	S
CDX1	C			f1	L, W, S
CDX2	C			f1	L, W, S
CEBPA	B			do	L, S
CEBPB	A		yes	f1	L, S, W	5'-T[TG]NNGNAA[TG]-3'
CEBPD	B			f1	L, S
CEBPE	A			f1	L, S, W
CEBPG	C			si	L, W, S
CEBPZ	D			si	P, S
COE1	B		almost	f2	S	May have secondary motif, compare "si" and "do" models; 5'-ATTCCCNNGGGAATT-3'; forms either a homodimer or a heterodimer.
COT1	B		yes	si, f1	W, L, S	Binds to both direct repeats and palindromes of the 5'-AGGTCA-3' motif; homodimer and probable heterodimer.
COT2	B	can have repeat-motif		f1, f2	W, L, S
CREB1	B		yes	f1	S, W	Binds the cAMP response element (CRE) (consensus: 5'-GTGACGT[AC][AG]-3'); Binds DNA as a dimer.
CREM	C		yes	f1	S	Binds the cAMP response element (CRE) (consensus: 5'-GTGACGT[AC][AG]-3'); Binds DNA as a dimer.
CRX	C		almost	si	W, S	Binds the sequence 5'-TAATC[CA]-3'
CSEN	E	first box of f1 is similar to consensus	no	si	P	Binds to the DRE element 5'-[AGT] [CG] [AT] [CT] [ACG] [CT]-3'; binds to DNA as a homomultimer.
CTCF	A			f2	S, W
CTNB1	E	quality "C", not marked as a TF		f2	S, W
CUX1	C	"si" model has better weight		f1	S, P
CXXC1	D			si	P, W
DBP	B		yes	si	W	Binds to the sequence 5'-RTTAYGTAAY-3'; Binds DNA as a homodimer or a heterodimer.
DDIT3	C			f1	S, W
DLX2	D			f1	S, L
DLX3	C			do	W, L
DLX4	E			f1	S, L
DLX5	E		yes	f1	S, L	5'-TAATTA-3' consensus sequence.
E2F1	A		yes	f2	L	5'-TTTC[CG]CGC-3'; Forms heterodimers with DP family members.
E2F2	B		yes	f1	L	5'-TTTC[CG]CGC-3'; Forms heterodimers with DP family members.
E2F3	B		yes	si	L, W	5'-TTTC[CG]CGC-3'; Binds cooperatively with DP-1.
E2F4	A		yes	do	L, W	5'-TTTC[CG]CGC-3'; Binds cooperatively with DP-1.
E2F5	B		yes	do	L, W	5'-TTTC[CG]CGC-3'; Binds cooperatively with DP-1.
E2F6	A		one out of many	f1	L, S	5'-TTTC[CG]CGC-3'. Has a preference for the 5'-TTTCCCGC-3'; Forms heterodimers with DP family members.
E2F7	D	too long motif		f1	L, S	5'-TTTC[CG]CGC-3'; Forms homodimers and, to a lesser extent, heterodimers with E2F8.
E4F1	D			f1	S	Binds DNA as homodimer.
EDF1	E	quality "D", not marked as a TF		f1	S
EGR1	A			f2	W, L	Forms a ternary complex with the serum response factor (SRF); makes extensive DNA contacts to the 5'side of SRF, but does not bind DNA autonomously.
EGR2	C			si	W, L
EGR3	D			f1	S
EGR4	D			f1	S	Binds to the DNA sequence 5'-GCGGGGGCG-3' (GSG).
EHF	A		yes	si	W, S	Consensus nucleotide core sequence GGAA.
ELF1	B			f1	S, L
ELF2	C			f1	S, L
ELF3	D		yes	f1	S, L	Consensus nucleotide core sequence GGA[AT].
ELF5	D		yes	f1	S, L	Consensus nucleotide core sequence GGA[AT].
ELK1	B			f1	S	Can form a ternary complex with the SRF.
ELK3	D			f1	S, L	Forms a ternary complex with the serum response factor (SRF).
ELK4	B			f1	S, L	Forms a ternary complex with the serum response factor (SRF).
ENOA	A			si	S, W	Bind DNA as homo- or heterodimers.
EOMES	D			f1	S	May have secondary motif, requires additional analysis; Contains 1 T-box DNA-binding domain.
EP300	E			si	P
EPAS1	D		yes	si	P, W	Should have HRE-like consensus; Binds to core DNA sequence 5'-[AG]CGTG-3'; Efficient DNA binding requires dimerization with another bHLH protein.
ERG	A			f1	S
ERR1	A		yes	f1	S, L	Binds to an ERR-alpha response element (ERRE) containing a single consensus half-site, 5'-TNAAGGTCA-3'; Binds DNA as a monomer or a homodimer
ERR2	A			f1	S, L	Nuclear receptor that binds DNA as monomer.
ERR3	B			f1	S, L
ESR1	B			do	L, S	G/A letter in the middle seems an artifact in the alignment; Binds DNA as a homodimer. Can form a heterodimer with ESR2.
ESR2	B			do, si	L, S	Binds DNA as a homodimer. Can form a heterodimer with ESR2.
ETS1	B			si	L, S
ETS2	C			f1	L, S
ETV1	E		yes	si	S	Consensus pentanucleotide 5'-CGGA[AT]-3'.
ETV4	B		yes	f1	W, L	The core-binding sequence is 5'[AC]GGA[AT]GT-3'.
ETV5	D		almost	f1	W, L	Binds to DNA sequences containing the consensus nucleotide core sequence GGAA.
ETV7	D		yes	si	L	Binds to the DNA sequence 5'-CCGGAAGT-3'.
EVI1	B			f1	S, W	Binds DNA as a homooligomer.
FEV	C			f1	S
FLI1	C	too long flanking sequences	yes	f1	S	5'-C[CA]GGAAGT-3'; homodimers or heterodimers.
FOS	A			si	L, W, S	Binds DNA as a heterodimer.
FOSB	C			f1	L, W	Binds DNA as a heterodimer.
FOSL1	C	"f2" model has better weight, and "si" has shorter flanks		f2	L, W, S
FOSL2	A			f1	L, W, S
FOXA1	B	too short flanking sequences	almost	f1	L, S	5'-[AC]A[AT]T[AG]TT[GT][AG][CT]T[CT]-3'; Binds DNA as a monomer.
FOXA2	B	too short flanking sequences	almost	f1	L, S	5'-[AC]A[AT]T[AG]TT[GT][AG][CT]T[CT]-3'; Binds DNA as a monomer.
FOXA3	C			f1	W, L, S
FOXC1	C		yes	f1	W, S
FOXC2	D			f1	S
FOXD1	D			si	S, W
FOXD3	D			f1	W, S
FOXF1	D			f1	S, W
FOXF2	D			f1	S, W
FOXH1	E			f1	S	Binds to the DNA sequence 5'-TGT[GT][GT]ATT-3'.
FOXI1	B			f1	S
FOXJ2	C			f1	S	Able to bind to two different type of DNA binding sites.
FOXJ3	A	possibly two similar motifs; si similar to family		f2, si	S, W
FOXM1	D			f1	S, P
FOXO1	C			si	L, P, W
FOXO3	B		yes	si	L, P, W	Binds to the DNA sequence 5'-[AG]TAAA[TC]A-3'.
FOXO4	C		yes	f1	L, S	Binds to insulin-response elements (IREs).
FOXP2	A			si	W, S
FOXP3	D			f1	S
FOXQ1	C			f1	S
FUBP1	D			f1	P
GABP1+GABP2	C			f1	S, L	Purine rich repeats (GA repeats); Heterotetramer of two alpha and two beta subunits.
GABPA	A			f1	S, L	Purine rich repeats (GA repeats); Heterotetramer of two alpha and two beta subunits.
GATA1	A		yes	si	L, S, W	Consensus sequence [AT]GATA[AG]; homodimers or heterodimers.
GATA2	A		almost	si	L, S, W	5'-AGATAG-3'
GATA3	B		almost	si	L, S, W	5'-AGATAG-3'
GATA4	B		almost	f1	L, S	5'-AGATAG-3'
GATA5	D			f1	L, S
GATA6	B			f2	L, S
GCM1	D			f1	S
GCR	B	second box of the motif seems significant, possibly can vary		si, do	P	Binds to glucocorticoid response elements (GRE).
GDNF	E	quality "C", not marked as a TF		f1	S	Binds DNA as a homodimer.
GFI1	C			f1	L, W
GFI1B	C			f1	L, S
GLI1	C			f1	L, S
GLI2	B	possibly secondary motif is present	almost	f1	L, S	Binds to the DNA sequence 5'-GAACCACCCA-3'.
GLI3	B		yes	si	L, W, S	Binds to the minimal GLI-consensus sequence 5'-GGGTGGTC-3'.
GLIS3	D		no	f1	S, W, L	Binds to the consensus sequence 5'-GACCACCCAC-3'.
GT2D1	E	quality "D", not marked as a TF		f1	S
GTF2I	E			f1	S
HAND1	D		yes	si	P, S	Binds the DNA sequence 5'-NRTCTG-3' (non-canonical E-box); Efficient DNA binding requires dimerization with another bHLH protein. Forms homodimers and heterodimers.
HBP1	D		no	f1	S	5'-TTCATTCATTCA-3'
HDAC1	E			f1	S
HEN1	C	possibly protein-protein complex		si	W, S	Efficient DNA binding requires dimerization with another bHLH protein.
HES1	D		one out of many	f1	W, S	Binds DNA on N-box motifs: 5'-CACNAG-3' with high affinity and on E-box motifs: 5'-CANNTG-3' with low affinity.
HESX1	D		no	f1	S	Binds to the palindromic PIII sequence, 5'-AGCTTGAGTCTAATTGAATTAACTGTAC-3'.
HEY1	F		no			Binds preferentially to the canonical E box sequence 5'-CACGTG-3'.
HEY2	D		yes	f1	S	Binds preferentially to the canonical E box sequence 5'-CACGTG-3'.
HIC1	C			si	W, S
HIF1A	A		yes	si	S, W	Binds to core DNA sequence 5'-[AG]CGTG-3' within the hypoxia response element (HRE); heterodimerization is required for DNA binding
HINFP	C		yes	f1	S	Binds to the consensus sequence 5'-CGGACGTT-3'
HLF	C			si	S, W, P	Binds DNA specifically as homodimer or heterodimer with other PAR factors
HLTF	D			f1	S
HME1	E			f1	S
HMGA1	D			f1	S, W
HMGA2	D			f1	S, W
HMGB2	E			f1	S, W
HNF1A	A			f1	S, L	Binds to the inverted palindrome 5'-GTTAATNATTAAC-3'; Binds DNA as a dimer.
HNF1B	B			f1	S, L	Binds to the inverted palindrome 5'-GTTAATNATTAAC-3'; Binds DNA as a dimer.
HNF4A	A			f1	S, L	Homodimerization is required for HNF4-alpha to bind to its recognition site.
HNF4G	C			f1	S, L
HNF6	C			f1	S	Binds DNA as a monomer.
HNRPK	E	"D" quality, not marked as a TF		f1	S	Binds tenaciously to poly(C) sequences.
HSF1	A			f2	L, S	Binds DNA as a monomer.
HSF2	A			si	L, S	DNA-binding homotrimer in stressed or heat shocked cells, otherwise found as a homodimer; binds heat shock promoter elements (HSE).
HTF4	A		yes	f1	S, W	Binds to the E box (5'-CANNTG-3')
HXA1	C			f1	S
HXA10	C		no	f1	P, L, S	Binds to the DNA sequence 5'-AA[AT]TTTTATTAC-3'
HXA13	C			f1	L, S
HXA5	D		almost	si	W	Binds specifically to the motif 5'-CYYNATTA[TG]Y-3'.
HXA7	D			f1	S
HXA9	D			f1	S	dimer with MEIS
HXB1	D			f1	S
HXB6	D			f1	S
HXB7	C			si	S, W
HXB8	C			do	W, S
HXC13	E			si	P
HXC6	D			f1	S
HXC8	D			f1	S
HXD10	D			f1	S
HXD13	D			f1	S
HXD4	D			f1	S
HXD9	D			f1	S
IKZF1	C			f1	S, W	Binds DNA as a heterodimer.
INSM1	C			f1	S, W
IRF1	C			si	L, W
IRF2	C			f1	L, S
IRF3	C			f1	L, S	Binds DNA as a homodimer
IRF4	C			si	L, W	Binds to the interferon-stimulated response element (ISRE)
IRF5	D	may be "E" quality		f1	L, S
IRF7	C			f1	L, W, S	Binds to the interferon-stimulated response element (ISRE); Homodimer
IRF8	D			si	L, S
IRF9	C			f1	L, S
ISL1	D			f1	S
ITF2	B			f1	S
JUN	A		yes	f1	S, L	5'-TGA[CG]TCA-3'
JUNB	B		yes	f1	S, L	5'-TGA[CG]TCA-3'
JUND	A			f1	S, L
KAISO	B		one out of many	f1	P	Binds to methylated CpG dinucleotides in the consensus sequence 5'-CGCG-3' and also binds to the non-methylated consensus sequence 5'-CTGCNA-3.
KLF1	C		yes	f1	S, L	Binds to the CACCC box.
KLF11	E			f1	S
KLF13	E			f1	S
KLF15	D	may be "E" quality		f1	S, L	Binds to the GA element.
KLF3	D		yes	f1	S	Binds to the CACCC box.
KLF4	A	"do" has better weight but T in the middle	yes	f2	S, W	Binds the 5'-CACCC-3' core sequence.
KLF5	E	may be "D" quality	unclear	si	P, S	Binds to GC box.
KLF6	D		unclear	si	S, P	Binds to GC box.
KLF8	C		yes	f1	S	Binds to CACCC-boxes promoter elements. Also binds the GT-box.
LEF1	C			f1	S
LHX2	D			f1	L, S
LHX3	C			f1	L, S
LMX1B	E	may be "D" quality		f1	S
MAF	B			f1	P, W	Binds to the sequence 5'-[GT]G[GC]N[GT]NCTCAGNN-3'; Binds to the T-MARE (Maf response element).
MAFA	D			f1	L, S	Binds DNA as a homodimer.
MAFB	D			f1	W	Binds DNA as a homo- or heterodimer.
MAFG	D			si	P	Binds DNA as a homo- or heterodimer.
MAFK	D			si	W	Binds DNA as a homo- or heterodimer.
MAX	A			f1	W	5'-CAC[GA]TG-3'; Efficient DNA binding requires dimerization with another bHLH protein.
MAZ	D			f1	W, P	Binds to multiple G/C-rich sites.
MBD1	E	may be "D" quality		f1	S
MBD2	B			si	P
MCR	D	may be "E" quality		f1	S	Binds to mineralocorticoid response elements (MRE).
MECP2	C			f1	S, P	It can bind specifically to a single methyl-CpG pair.
MEF2A	B			f1	L, S
MEF2C	B			f1	L, S
MEF2D	C		no	f1	L, S	Binds specifically to the MEF2 element, 5'-YTA[AT]4TAR-3'.
MEIS1	C			f2	L, S
MEIS2	B			do	L, W	May have secondary motif, additional analysis required.
MITF	C		almost	f1	S	Binds to a symmetrical DNA sequence (E-boxes) (5'-CACGTG-3').
MLXPL	D		no	f1	S	Binds to the canonical and non-canonical E box sequences 5'-CACGTG-3' ; Binds DNA as a heterodimer with TCFL4/MLX
MSX2	D	may be "E" quality		f1	S
MTF1	C			f1	S	Binds to the metal responsive element (MRE).
MYB	C	very short flanking sequences	yes	f1	S	Recognizes the sequence 5'-YAAC[GT]G-3'.
MYBB	D			f1	S
MYC	B		yes	f1	L, S	Binds DNA in a non-specific manner, yet also specifically recognizes the core sequence 5'-CAC[GA]TG-3'
MYCN	B			si	W	Efficient DNA binding requires dimerization with another bHLH protein.
MYF5	E			f1	S	Efficient DNA binding requires dimerization with another bHLH protein.
MYF6	C			f1	S, L	Efficient DNA binding requires dimerization with another bHLH protein.
MYOD1	C			f1	W, L	Efficient DNA binding requires dimerization with another bHLH protein.
MYOG	D			f1	L, P	Efficient DNA binding requires dimerization with another bHLH protein.
MZF1	D			f1	S	Binds DNA as a homodimer.
NANOG	C		one out of many	f1	S	5'-TAAT[GT][GT]-3' or 5'-[CG][GA][CG]C[GC]ATTAN[GC]-3'
NDF1	C		yes	f1	S	5'-CANNTG-3'
NELFE	F
NF1	E	"C" quality, not marked as a TF		f1, do	P
NF2L1	C			f1	P, S
NF2L2	D			si	W, P	Binds to antioxidant response (ARE) elements.
NFAC1	A	2 motifs possibly reflect dimeric structure		si, do	L, S
NFAC2	B			f1	L, S
NFAC3	B			f1	L, S
NFAC4	C			f1	L, S
NFAT5	D			f1	S	Binds DNA as a homodimer.
NFE2	A			f2	S, W	Binds DNA as a homodimer.
NFIA+NFIB+NFIC+NFIX	C	G/A in the middle possibly represents an artificial effect		si, f2	P, W	5'-TTGGCNNNNNGCCAA-3'; Binds DNA as a homodimer.
NFIL3	C		almost	si	W, P	5'-[GA]TTA[CT]GTAA[CT]-3'; Homodimer.
NFKB1	B		yes	f1	L, S	5'-GGRNNYYCC-3'
NFKB2	D		yes	f1	L, W	5'-GGRNNYYCC-3'
NFYA	A			f1	L, S	Binding to a CCAAT motif; Heterotrimeric transcription factor composed of three components, NF-YA, NF-YB and NF-YC.
NFYB	A			f1	L, S	Binding to a CCAAT motif; Heterotrimeric transcription factor composed of three components, NF-YA, NF-YB and NF-YC.
NFYC	B			f1	L, S	Binding to a CCAAT motif; Heterotrimeric transcription factor composed of three components, NF-YA, NF-YB and NF-YC.
NKX21	D			f1	L, W, P
NKX22	D			si	L, W, P
NKX25	C			f1	L, W, P
NKX28	C			f1	L, W, P
NKX31	C		yes	si	L, W, P	5'-TAAGT[AG]-3'
NKX32	C			f1	L, W, P
NOBOX	C			si	W, P
NOTC1	E			si	S
NR0B1	D	may be "E" quality		si	P, W
NR1D1	C			f1	S, W
NR1H2	D	may be "E" quality		f1	S
NR1H3	E			f1	S	Forms a heterodimer with RXR.
NR1H4	C			f1	W, L	Heterodimer of LXRA and RXR.
NR1I2	C			si, f2	L	Forms a heterodimer with RXR.
NR1I3	C			si, f2	L	Heterodimer of NR1I3 and RXR
NR2C1	C			si	L, P, W	Binds DNA as a homo- or heterodimer.
NR2C2	A		yes	f1	L, S	Binds to hormone response elements (HREs) consisting of two 5'-AGGTCA-3' half site direct repeat consensus sequences.
NR2E3	C			f1	S
NR2F6	D		almost	f1	S	Contain the imperfect 5'-AGGTCA-3' direct or inverted repeats with various spacings.
NR4A1	C		almost	f1	L, W	Binds the NGFI-B response element (NBRE) 5'-AAAAGGTCA-3'.
NR4A2	C			si	L, W
NR4A3	D			f1	L, W	Binds to the B1A response-element.
NR5A2	C		one out of many	f1	S, P, W	Binds to the sequence element 5'-AACGACCGACCTTGAG-3'; monomer.
NR6A1	B		yes	do	W	Binds to a response element containing the sequence 5'-TCAAGGTCA-3', Homodimer.
NRF1	A			f1	S	Binds DNA as a homodimer.
NRL	E			f1	S
OBF1	E			f1	S
ONEC2	D	may be "E" quality		si	W, S
OTX1	D		almost	f1	L, S	5'-TCTAATCCC-3'.
OTX2	C		almost	si	L, W	5'-TCTAATCCC-3'.
OVOL1	C			f1	W, S, P
P53	C			f2	P, S, W
P63	D	secondary box not found		si	P, L	Binds DNA as a homotetramer.
P73	D			si	P, L
PARP1	E			si	P
PAX2	D			f1, si	L
PAX3	E			si	L	Can bind to DNA as a heterodimer with PAX7.
PAX5	D			f1, si	L	Binds DNA as a monomer.
PAX6	D			f1	P
PAX8	D			f1	L, S
PBX1	B		yes	do	L, P	5'-ATCAATCAA-3'
PBX2	C			f1	L, S	5'-ATCAATCAA-3'.
PBX3	A		almost	f2	L, W	5'-ATCAATCAA-3
PDX1	C		yes	do	W, P	5'-[CT]TAAT[TG]-3'.
PEBB	C		unclear	f1	S, W	5'-PYGPYGGT-3'
PHX2A	E			f1	S
PHX2B	E			f1	S
PIT1	C		no	f1	S, W	5'-TAAAT-3'.
PITX1	E			f1	S
PITX2	D			si	W
PITX3	E			si	S
PKNX1	D			si	P, W
PLAG1	D	posibly 2-box motif is significant		f1, si	P
PLAL1	D			si	S
PLAL2	E			f1	S
PO2F1	B		yes	f1	L, S	5'-ATTTGCAT-3'
PO2F2	B		yes	si	L, P	5'-ATTTGCAT-3'
PO3F1	C		yes	f1	L, S	5'-ATTTGCAT-3'
PO3F2	D		no	si	W	Recognition sequence which consists of two distinct half-sites, ('GCAT') and ('TAAT'), separated by a nonconserved spacer region of 0, 2, or 3 nucleotides.
PO4F1	E			f1	S
PO4F2	D			si	W
PO4F3	E	possibly "D" quality		f1	S
PO5F1	B		yes	do	P	comparing to UniPROT; 5'-ATTTGCAT-3'
PO6F1	D		no	f1	W	comparing to JASPAR; 5'-ATGATAAT-3'
PPARA	C			f1, f2	L, W	Binds DNA as a heterodimer with RXRA.
PPARD	D			f1	L, P	Binds DNA as a heterodimer with the retinoid X receptor.
PPARG	B			f1, si	L, S
PRDM1	A			f1	S
PRGC1	E	"B" quality, not marked as a TF		si	P
PRGR	C	possibly 2-box motif is significant		f1, do	P
PROP1	D	possibly "E" quality		f1	S
PROX1	F
PRRX1	D	possibly "E" quality		f1	S
PRRX2	C			f1	W, S
PSIP1	E	"D" quality, not marked as a TF		f1	S
PTF1A	C		yes	f1	S	5'-CANNTG-3'
PURA	D	possibly "E" quality		f1	S	Binds DNA as a homodimer or heterodimer.
RAD21	E	CTCF motif found		do	P
RARA	C	possibly 2-box motif is significant		f1, f2	L	Tandem 5'-AGGTCA-3' sites; Binds DNA preferentially as a heterodimer.
RARB	D		one out of many	f1	L, P	Tandem 5'-AGGTCA-3' sites.
RARG	C	possibly 2-box motif is significant	almost	f1, do	L	Tandem 5'-AGGTCA-3' sites
RBL1	E	"D" quality, not marked as a TF		f1	S
REL	C			do	L, W
RELB	C			si	L, W
REST	A			f1	S
RFX1	C			f1	L	Binds DNA as a homodimer.
RFX2	C			f1	L, S
RFX3	B			f1	L, S
RORA	B		yes	f1	L, S	5'-[AT][TA]A[AT][CGT]TAGGTCA-3'
RORG	C			f1	L, S
RPC1	E	possibly pol-III specific motif
RREB1	D			si	P
RUNX1	B		unclear	f1	L, S	5'-PYGPYGGT-3'
RUNX2	B		unclear	f1	L, S	5'-PYGPYGGT-3'
RUNX3	B		unclear	si	L, P	5'-PYGPYGGT-3'
RXRA	B			f1	W, L	Tandem 5'-AGGTCA-3' sites.
RXRB	C			f1	S, P	Tandem 5'-AGGTCA-3' sites.
RXRG	B			f1	S, L	Tandem 5'-AGGTCA-3' sites.
SATB1	E			f1	S
SETB1	E			si	P
SIN3A	F
SIRT6	F			si
SIX3	E			f1
SIX5	E		no	f1	S	5'-TCA[AG][AG]TTNC-3'
SMAD1	D			si	L, P	Momomer.
SMAD2	D			si	L, P	Binds DNA as a momomer or homooligomer.
SMAD3	C			f1	L, S	Binds DNA as a monomer.
SMAD4	C	possibly "f1" as stable		si	L, P
SMCA4	F
SMRC1	B	possibly not its own motif, protein acts as cofactor		f1	P, S
SMRC2	F
SNAI1	C		yes	f1	L, S	Binds to 3 E-boxes.
SNAI2	C			f1	L, S
SNF5	F
SOX10	D			si	L, P
SOX13	D		yes	f1	L, S	Binds to the sequence 5'-AACAAT-3' .
SOX15	D		yes	f1	L, S	Binds to the sequence 5'-AACAAT-3' .
SOX17	D		one out of many	f2	W	Binds to the sequences 5'-AACAAT-'3 or 5'-AACAAAG-3'.
SOX18	D	flanks seem to be wrong	yes	f1	S	5'-AACAAAG-3'
SOX2	B			f1	S
SOX4	C		almost	f1	S	5'-AACAAAG-3'
SOX5	C			f1	W	5'-AACAAT-3'
SOX9	B			f1	S
SP1	A	f1 seems TRANSFAC-based (too short segments), f2 seems to be similar to other SP-s		f1, f2	L
SP2	C			si	L, W
SP3	B			f1	L	Binds to GT and GC boxes
SP4	D			f1	L, S	Binds to GT and GC boxes
SPI1	A		yes	si	W	5'-GAGGAA-3
SPIB	B		yes	f1	S	5'-GAGGAA-3'
SPZ1	D		yes	f1	S	5'-CANNTG-3'(E box) and the G-box motif.
SRBP1	B		one out of many	f2	W, L	E-box motif (5'-ATCACGTGA-3') and to SRE-1 (5'-ATCACCCCAC-3').
SRBP2	B		yes	f1	L	Binds the sterol regulatory element 1 (SRE-1) (5'-ATCACCCCAC-3').
SRF	A	best flanks present for "do"	unclear	do	P	Binds to the serum response element (SRE).
SRY	B		yes	f1	S	5'-[AT]AACAA[AT]-3'
STA5A	B			do	L, S	Forms a homodimer or a heterodimer with a related family member
STA5B	B			f1	L, S	Forms a homodimer or a heterodimer with a related family member; Binds to the GAS element
STAT1	A	best flanks present for "f2"		f2	L, P
STAT2	B	strangely is not similar to other STAT-s		f1	S
STAT3	B			si	L, W	Forms a homodimer or a heterodimer with a related family member.
STAT4	C			si	L, W
STAT6	C			do	L, P, W	Forms a homodimer or a heterodimer with a related family member.
STF1	B		one out of many	f1	S	5'-YCAAGGYC-3' and 5'-RRAGGTCA-3'
SUH	C			f1	S
SUZ12	F
TAL1	C	possibly 2-box motif is significant		f1, f2	S, P	Efficient DNA binding requires dimerization with another bHLH protein.
TBP	C			f1	S	Binds DNA as monomer.
TBX2	D	possibly "E" quality		f1	S
TBX3	D	possibly "E" quality		f1	S
TBX5	D			si	W
TCF7	C		yes	f1	S	5'-WWCAAAG-3'
TEAD1	D		almost	f1	S	5'-GTGGAATGT-3'. Binds to the M-CAT motif.
TEAD3	D			si	L, W
TEAD4	D			f1	S
TEF	D		no	f1	S	5'-[TC][AG][AG]TTA[TC][AG]-3'
TF2B	E			f1	P
TF3A	E			f1	S
TF3B	F
TF3C2	E			f1	S
TF65	A			f2	W, S
TF7L2	A		almost	f1	S	5'-CCTTTGATC-3'
TFAP4	C		yes	si	P	5'-CAGCTG-3'; Efficient DNA binding requires dimerization with another bHLH protein. Homodimer.
TFCP2	D			f1	S
TFDP1	D		yes	f1	S	5'-TTTC[CG]CGC-3'
TFE2	C		yes	f2	W, L	Dimers bind DNA on E-box motifs: 5'-CANNTG-3'. Binds to the kappa-E2 site
TFE3	C			f1	S, L	Binds E-box sequences (3'-CANNTG-5'). Efficient DNA-binding requires dimerization.
TFEB	C			f1	L, S	Binds E-box sequences (3'-CANNTG-5'). Efficient DNA-binding requires dimerization.
TGIF1	D			f1, si	S, P
THA	C	2-box motif seems significant		f1, f2	L
THB	C	2-box motif seems significant		f1, do	L	Binds DNA as a dimer; homodimer and heterodimer with RXRB.
TLX1	D	Initial data for dimer complex with NFIC	no	f1, f2	P	Binds to the DNA sequence 5'-GGCGGTAAGTGG-3'.
TOPRS	E			f1	S
TWST1	D			f1	S	Efficient DNA binding requires dimerization with another bHLH protein. Homodimer or heterodimer with E proteins such as TCF3.
TYY1	B		yes	f2	W, S	5'-CCGCCATNTT-3'
UBIP1	D			f1	S
USF1	A			f1	L, S	(E-boxes) (5'-CACGTG-3')
USF2	B			f1	L, S	(E-boxes) (5'-CACGTG-3')
VDR	C	2-box motif seems significant		f1, f2	P
VSX2	D			si	P
WT1	D		almost	f1	W	5'-CGCCCCCGC-3'; Homodimer.
XBP1	C	full motif not recovered	almost	f1	S, W	Binds DNA preferably to the CRE-like element 5'-GATGACGTG[TG]N3[AT]T-3', and also to some TPA response elements (TRE).
XRCC4	F
XRCC5+XRCC6	F
YBOX1	D		no	f2	W	5'-[CU]CUGCG-3'
Z354C	E			f1	P	Binds to 5'-CCACA-3' core sequence.
ZBT16	E			si	P
ZBT7A	D		no	f1	S	5'-[GA][CA]GACCCCCCCCC-3'
ZBT7B	D			si	P
ZBTB4	D			si	W, L
ZBTB4!METH	D			f1	S, L
ZBTB6	D			si	W
ZEB1	D		yes	do	W	5'-CANNTG-3'
ZEP1	D		no	f1	S	5'-GGGACTTTCC-3'
ZEP2	D		no	si	L, P	5'-GGGACTTTCC-3'
ZFHX3	D			f1	S
ZFX	C			f1	S
ZIC1	B		yes	f1	L, S	5'-TGGGTGGTC-3'
ZIC2	C			f1	L, S
ZIC3	C			f1	L, S	5'-GGGTGGTC-3'
ZN143	D			si	W
ZN148	D	possibly "E" quality		si	W
ZN219	D			f1	S
ZN238	D			f1	S	5'-[AC]ACATCTG[GT][AC]-3'
ZN263	F
ZN274	F
ZN333	D			f1	S
ZN350	C		yes	f1	S	5'-GGGxxxCAGxxxTTT-3'
ZN384	C		yes	f1	W	5'-[GC]AAAAA-3'
ZN423	D	possibly "E" quality	no	f1	W	Binds DNA as a homodimer; consensus sequence 5'-CCGCCC-3'
ZN589	D	possibly "E" quality		f1	S
ZZZ3	F	requires additional analysis after AG-repeat masking

## Sheet: Supplementary table 1a
TF	quality	model
ARI3A	D	f1, do		Supplementary table 1a
COT1	B	si, f1		TFs with 2 curated models. More details on curation are given in the Supplementary table 1.
COT2	B	f1, f2		Overall curation statistics and comments are given on the right of the Supplementary table 1.
ESR2	B	do, si
FOXJ3	A	f2, si
GCR	B	si, do
NF1	E	f1, do
NFAC1	A	si, do
NFIA+NFIB+NFIC+NFIX	C	si, f2
NR1I2	C	si, f2
NR1I3	C	si, f2
PAX2	D	f1, si
PAX5	D	f1, si
PLAG1	D	f1, si
PPARA	C	f1, f2
PPARG	B	f1, si
PRGR	C	f1, do
RARA	C	f1, f2
RARG	C	f1, do
SP1	A	f1, f2
TAL1	C	f1, f2
TGIF1	D	f1, si
THA	C	f1, f2
THB	C	f1, do
TLX1	D	f1, f2
VDR	C	f1, f2

## Sheet: Supplementary table 2
Manual annotation of 18 proteins with F-quality models
BC11A		Zinc finger protein, may be TF
BCL3		Transcription co-activator, probably not TF
BRF2		Zink finger, component of TFIIIB complex of initiator complex. Probably not specific
HEY1		TF factor binding to E-box
NELFE		Transcription elongation factor
PROX1		Homeodomain transcription factor. Prospero like
SIN3A		Histon acetilation complex subunit, transcriptional co-repressor. Probably does not have sequence specific DNA binding activity
SIRT6		Histon deacetilation factor. Probably does not have specific DNA binding activity
SMCA4		Helicase, component of many transcription initiation complexes. Probably does not have sequence specific DNA binding activity
SMRC2		Chromatin remodeling factor. Probably does not have sequence specific DNA binding activity
SNF5		Reported as Transcription factor TYE4, but actually probably is a chromatin remodeling factor. No data on sequence-specific activity
SUZ12		Zink finger, component of Polycomb. May be a TF, may be not sequence specific
TF3B		Tata box binding factor. Zinc finger. Component of Pol III iniciation complex
XRCC4		Recombination protein. DNA reparation. Not TF
XRCC5+XRCC6		Two subunits of CTCBF binding factor. Multiactivity protein, can operate as helicase and chromosome translocatio protein. May have both sequence specific binding and sequence non-specific binding activity
ZN263		Kruppel-like TF
ZN274		Transcription repressor, Zinc-finger. Probably TF
ZZZ3		Zinc-finger. Probably TF
red	TFs
yellow	putative TFs
white	non-TF

## Sheet: Supplementary table 3
	AUC values			AUC ratios
TF	HOCOMOCO	TRANSFAC	JASPAR	HOCOMOCO	TRANSFAC	JASPAR
GATA1_y	0.401315	0.53958	0	0.743754	1	0
STAT1_y	0.484607	0.640666	0.50214	0.756412	1	0.783778
TYY1_y	0.47727	0.594421	0.369332	0.802916	1	0.62133
JUND_y	0.559901	0.680951	0	0.822234	1	0
MAX_y	0.495619	0.527833	0.480178	0.938971	1	0.909716
PO2F2_h	0.567288	0.59293	0	0.956755	1	0
SRBP1_y	0.588287	0.609274	0	0.965554	1	0
SRF_h	0.746336	0.767335	0.72454	0.972634	1	0.94423
RXRA_h	0.824057	0.819947	0.846527	0.973456	0.968601	1
REST_h	0.957718	0.962817	0.947084	0.994704	1	0.983659
GCR_y	0.561255	0.560321	0.383764	1	0.998337	0.683761
CTCF_h	0.989286	0.986045	0.988324	1	0.996724	0.999028
EGR1_h	0.977898	0.973661	0.961523	1	0.995668	0.983255
JUN_y	0.662203	0.656506	0.639976	1	0.991398	0.966436
SPI1_h	0.985293	0.97572	0.848235	1	0.990284	0.860896
TF65_y	0.541727	0.533804	0.51263	1	0.985376	0.946289
HTF4_h	0.843996	0.830761	0	1	0.984319	0
HSF1_y	0.427102	0.419698	0	1	0.982666	0
SP1_h	0.954632	0.937719	0.928645	1	0.982284	0.972778
JUND_h	0.876168	0.856587	0	1	0.977651	0
E2F1_y	0.584109	0.569585	0.412023	1	0.975134	0.705387
USF1_h	0.976102	0.946806	0.865849	1	0.969986	0.887048
ATF3_y	0.500756	0.485682	0	1	0.969897	0
NR2C2_y	0.509347	0.488704	0	1	0.959471	0
FOSL2_h	0.737151	0.700501	0	1	0.950282	0
COE1_h	0.914076	0.863212	0.861553	1	0.944355	0.94254
SRBP2_y	0.497292	0.468047	0	1	0.941191	0
STAT2_y	0.609098	0.572975	0	1	0.940693	0
GABPA_h	0.960665	0.895223	0.952761	1	0.931879	0.991773
IRF4_h	0.917382	0.846769	0	1	0.923028	0
BHE40_h	0.814466	0.75099	0	1	0.922064	0
E2F4_y	0.54069	0.495144	0	1	0.915764	0
PAX5_h1	0.718687	0.640417	0.595314	1	0.891093	0.828335
ERR1_y	0.56347	0.500969	0	1	0.889079	0
KAISO_h	0.632646	0.56052	0	1	0.885993	0
GCR_h	0.847496	0.736127	0.674496	1	0.86859	0.795869
PAX5_h	0.823112	0.694327	0.692477	1	0.843539	0.841291
FOS_y	0.531819	0.439138	0	1	0.825729	0
PBX3_h	0.695799	0.511303	0	1	0.734843	0
